# Supplementary material
Source: PubMed Central journal article supplement (PMC6795297)

# PD-L1 and calcitriol dependent liposomal antigen-specific regulation of systemic inflammatory autoimmune disease

## Supplementary Information

### Supplementary Figure 1.

DiI-labelled calcitriol-OVA<sub>323-339</sub> liposomes were injected s.c. or i.v. to tailbase of naïve or mice primed in tailbase with OVA/QuilA 3 days previously. Biodistribution of liposomes in excised tissue from mice (n=3 per group) were assessed 24h after injection by IVIS in vivo imaging. Average tissue radiant efficiency was quantified as shown.

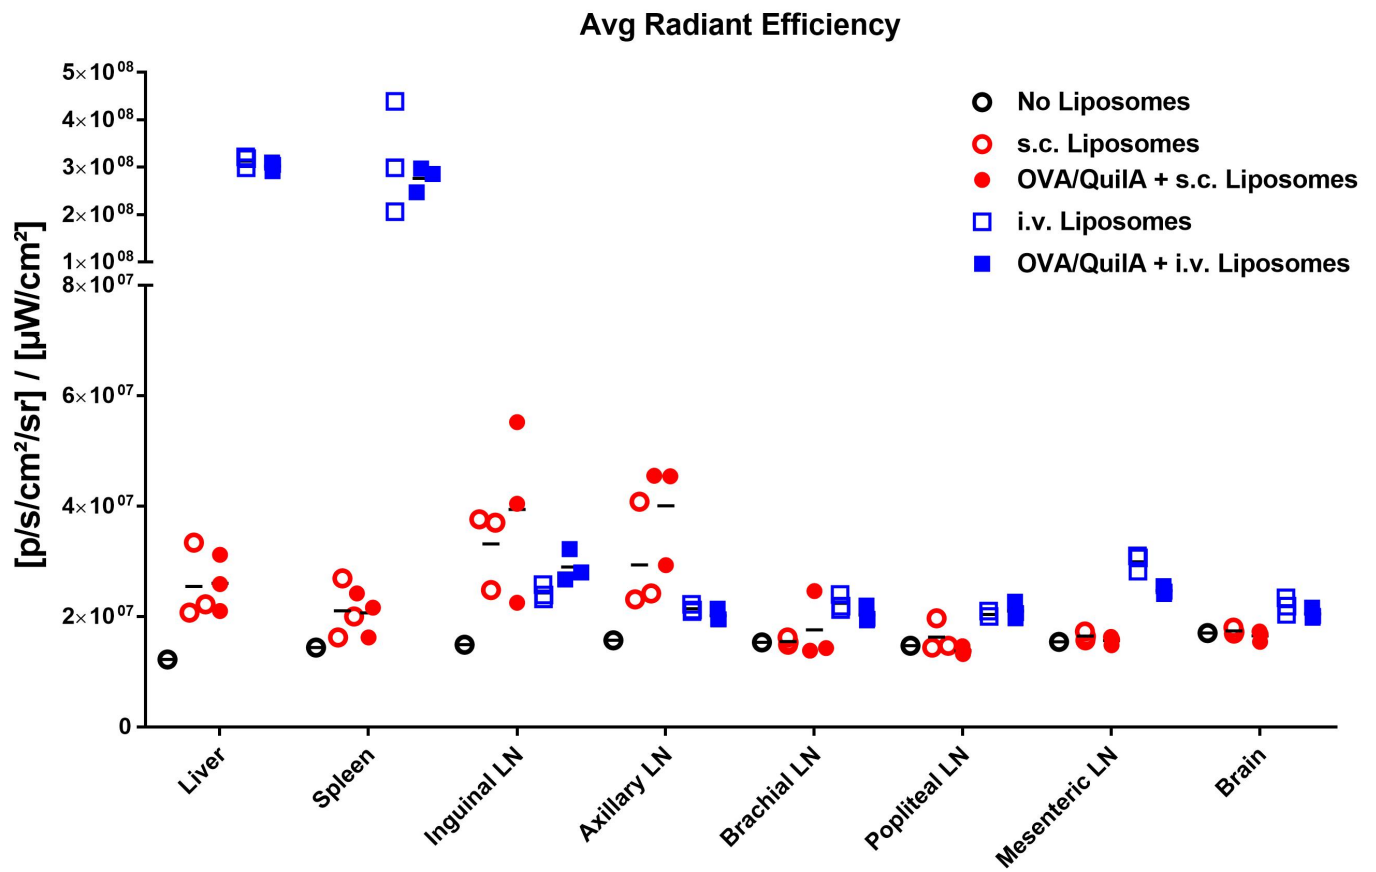

## Supplementary Figure 2.

Liposomes were spiked with  $^3\text{H}$ -calcitriol and  $^{14}\text{C}$  phospholipids during preparation. Radiolabeled liposomes were injected s.c. (100  $\mu\text{l}$ ) and at pre-determined time intervals blood, liver, spleen, kidneys, draining lymph node (A) and injection site skin and subcutaneous tissue (B) were collected over 24 h (n=5).

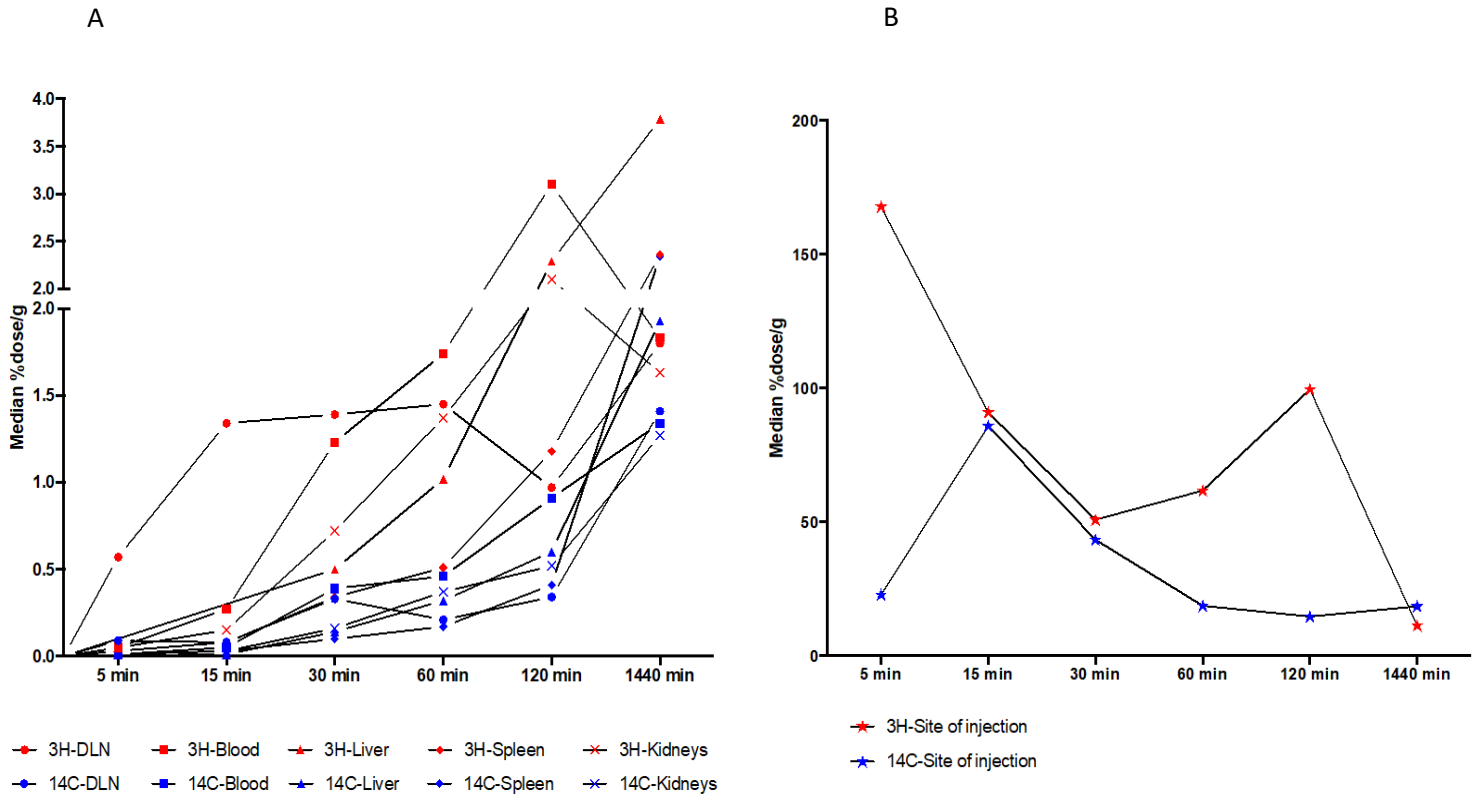

### Supplementary Figure 3. Gating strategy for uptake studies and frequency of APC populations in naïve and primed ILN

DiI-labelled calcitriol-OVA<sub>323-339</sub> liposomes were injected s.c. to tailbase of naïve BALB/c mice or mice primed in tailbase with OVA/QuilA 3 days previously. dLN cells were stained with CD11c, CD11b, MHC class II, Siglec H, Ly6C and CD19. Unlabelled liposomes were injected and used to define DiI<sup>+</sup> populations. Doublets and dead cells were excluded. **A:** Gating strategy for antigen-presenting cell populations in draining lymph nodes. Cell populations were defined as: *B cells* CD19<sup>+</sup>, MHC-II<sup>+</sup>, CD11c<sup>-</sup>; *moDCs* CD19<sup>-</sup>, Ly6gG<sup>-</sup>, MHC-II<sup>lo/+</sup>, CD11b<sup>+</sup>, CD11c<sup>int</sup>, Ly6C<sup>+</sup>; *cDCs* CD19<sup>-</sup>, Ly6G<sup>-</sup>, MHC-II<sup>lo/+</sup>, CD11b<sup>+/-</sup>, CD11c<sup>hi</sup>, Ly6C<sup>-</sup>; *CD11b<sup>+</sup>Ly6C<sup>-</sup> DCs* CD19<sup>-</sup>, Ly6gG<sup>-</sup>, MHC-II<sup>+</sup>, CD11b<sup>+</sup>, CD11c<sup>dim</sup>, Ly6C<sup>-</sup>; *plasmacytoid DCs* CD19<sup>-</sup>, MHC-II<sup>+</sup>, Siglec H<sup>+</sup>, CD11c<sup>dim</sup>; and *CD8<sup>+</sup> DCs* CD19<sup>-</sup>, Ly6G<sup>-</sup>, MHC-II<sup>lo/+</sup>, CD11c<sup>+</sup>, CD11b<sup>-</sup>. **B:** Numbers of cells taking up liposomes in naïve and primed lymph nodes. Flow cytometric data pooled from 5 mice/group.

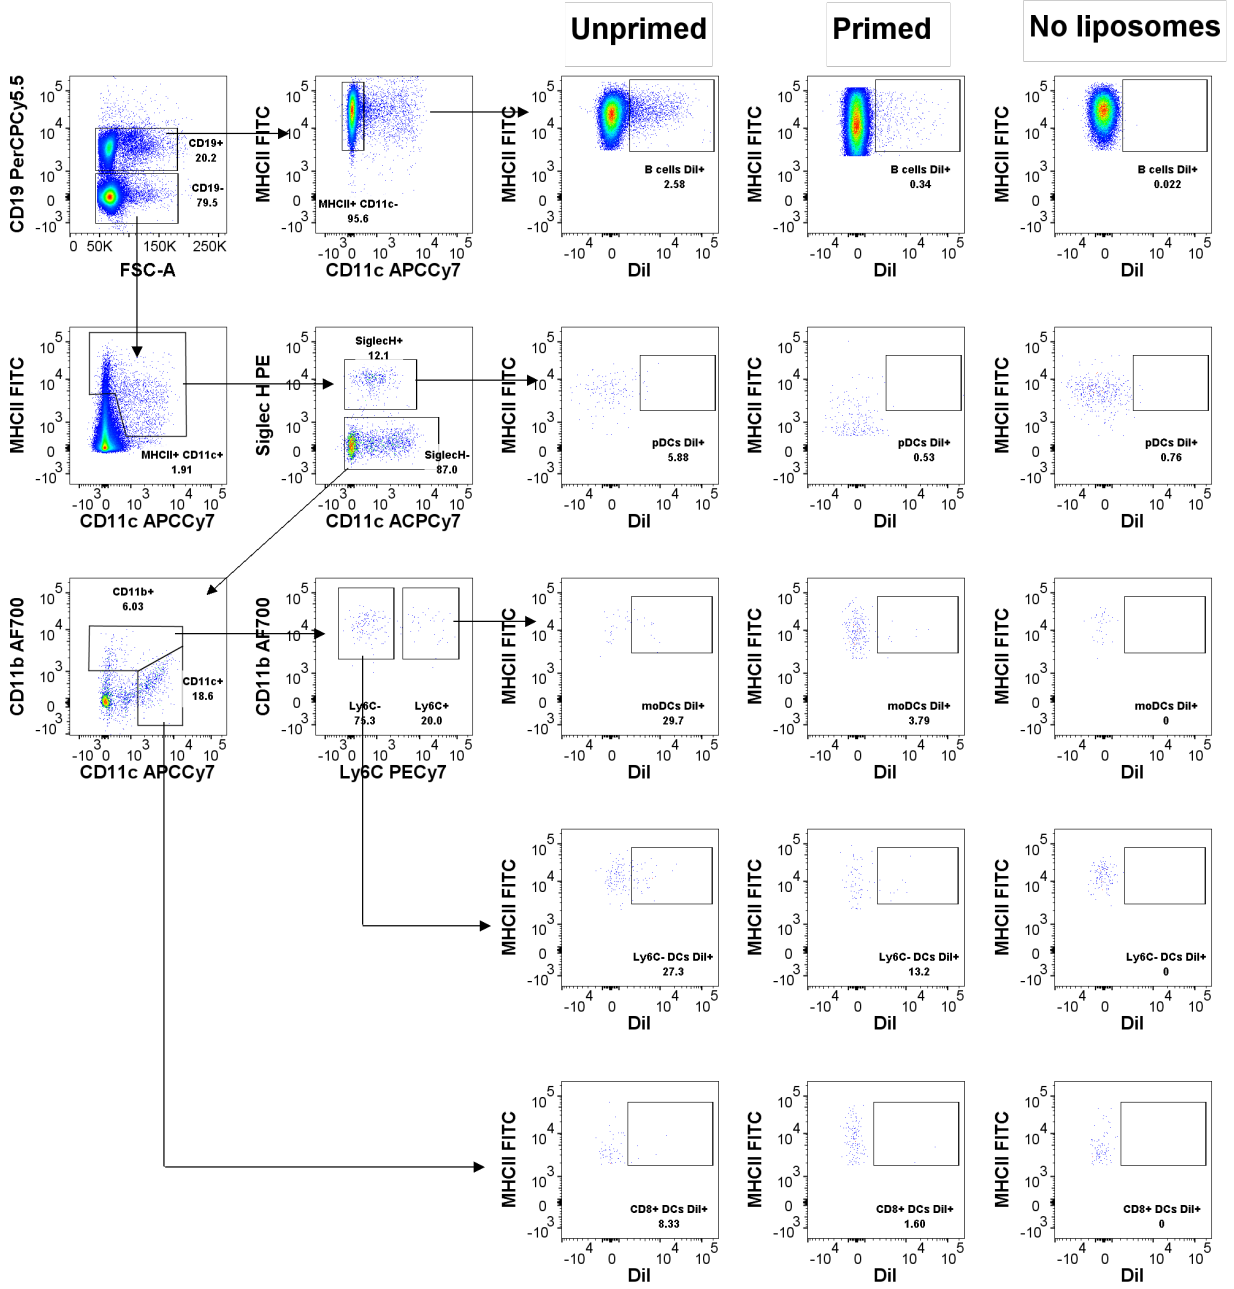

### Supplementary Figure 4. Migratory dLN DCs take up calcitriol loaded liposomes

BALB/c female mice (6-8 weeks) were primed with OVA/Quil A 24 h before liposome injections. Primed mice were injected with 100 $\mu$ l of unlabeled liposomes, BODIPY FL-calcitriol liposomes, BODIPY TXR-labeled liposomes or dual labeled BODIPY FL-calcitriol + BODIPY TXR-labeled liposomes. After 5 h ILN were harvested. Single cell suspensions were stained with anti-CD11b-AF700, anti-CD11c-APC.Cy7, anti-I-A/I-E-pacific blue, anti-F4/80-PE.Cy7, anti-CD3-APC, anti-CD19-APC and then analyzed by flow cytometry. The uptake of FL-calcitriol and TXR-DHPE within gate L is shown in the bottom 3 panels.

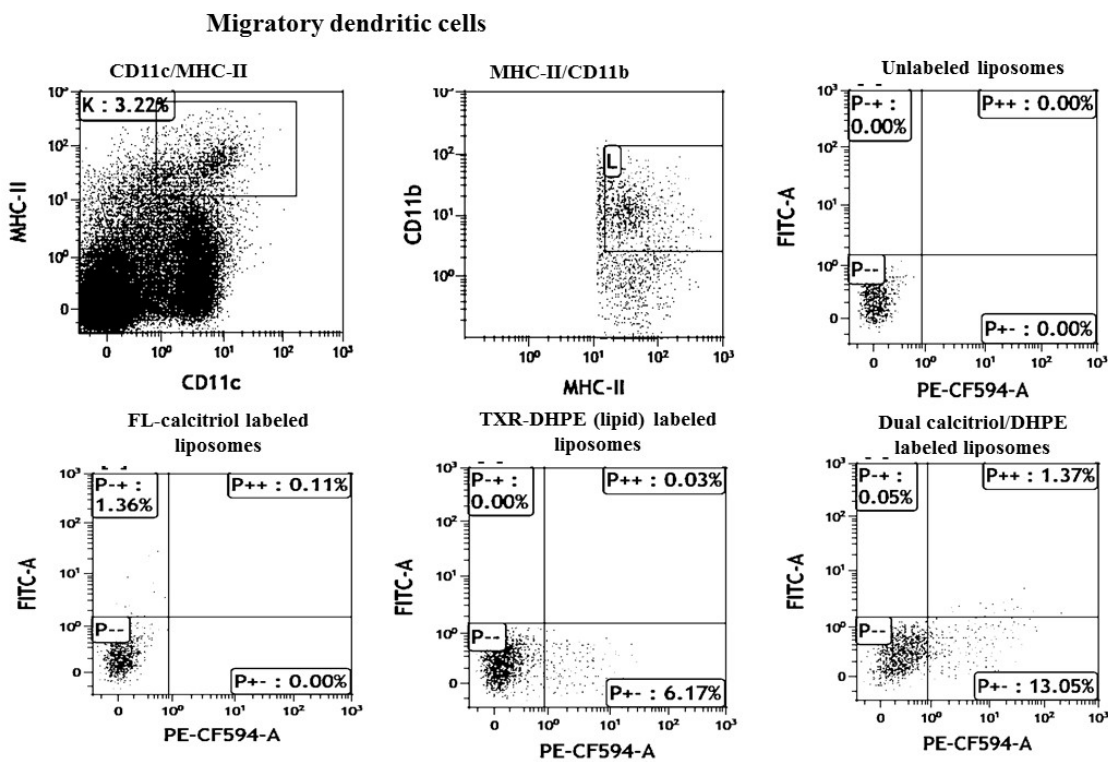

## Supplementary Figure 5. Peptide concentration and volume-dependent induction of Treg by OVA/calcitriol liposomes

**A**, Liposomes (100  $\mu$ L) encapsulating 400 ng/mL calcitriol and varying concentrations of OVA<sub>323-339</sub> were administered s.c. to tailbase of BALB/c mice adoptively transferred with  $2 \times 10^6$  CTV-labelled DO11.10 T cells 24h previously. Three days later, CTV dilution of gated CD4<sup>+</sup>KJ-126<sup>+</sup> T cells was analyzed in spleen by flow cytometry. **B**, The same liposome preparations (100 $\mu$ l) were administered s.c. twice to neck scruff of DO11.10 mice 7 days apart or mice remained naïve. CD4<sup>+</sup>Foxp3<sup>+</sup> Treg were evaluated in PB on day 11. Mice were then primed with OVA/QuilA and CD4<sup>+</sup>Foxp3<sup>+</sup> Treg were evaluated in spleen on day 18. **C**, Varying volumes of DiI-labeled liposomes encapsulating 400 ng/mL calcitriol and 30 $\mu$ g/ml OVA<sub>323-339</sub> were administered along with OVA/QuilA s.c. to tailbase of BALB/c mice. The proportion of DiI<sup>+</sup>CD11b<sup>+</sup> DCs was evaluated in iLN 24h later. Either 100  $\mu$ l or a 1:3 dilution of calcitriol-OVA liposomes was administered s.c. into the neck scruff of DO11.10 mice on days 0 and 7. Splenic CD4<sup>+</sup>Foxp3<sup>+</sup> T cells were analyzed on day 14.

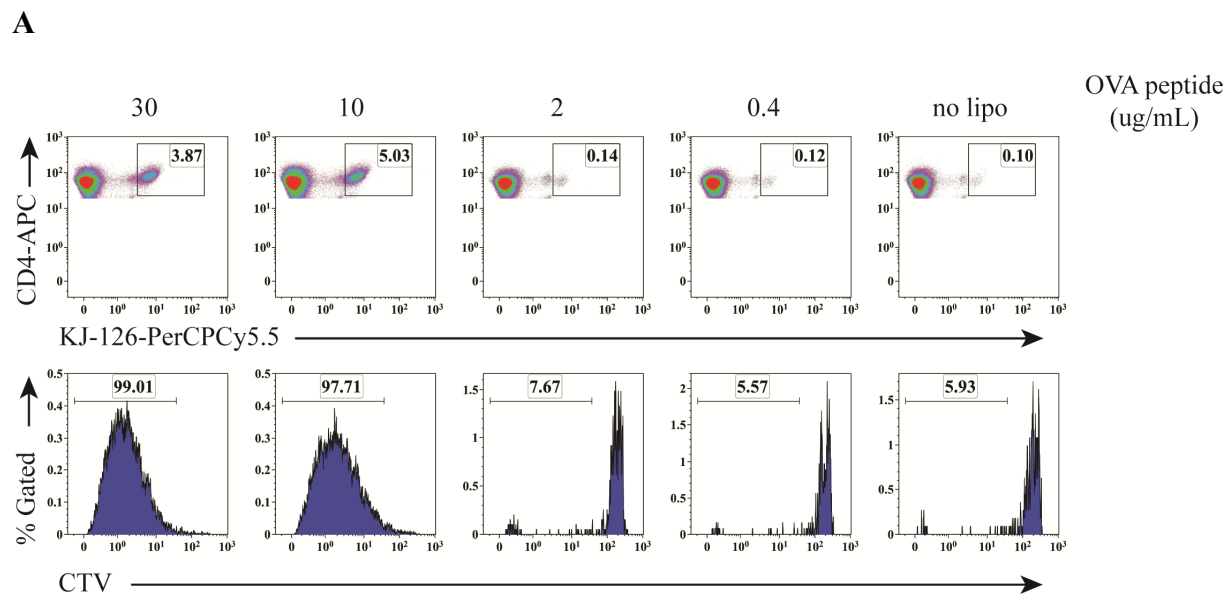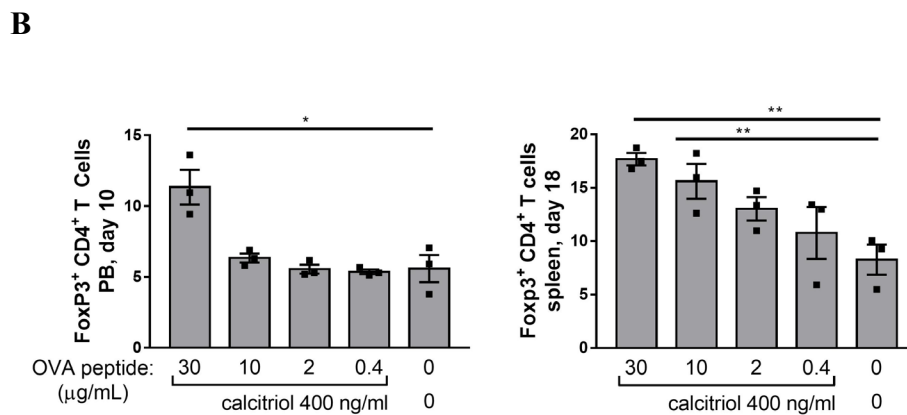

C

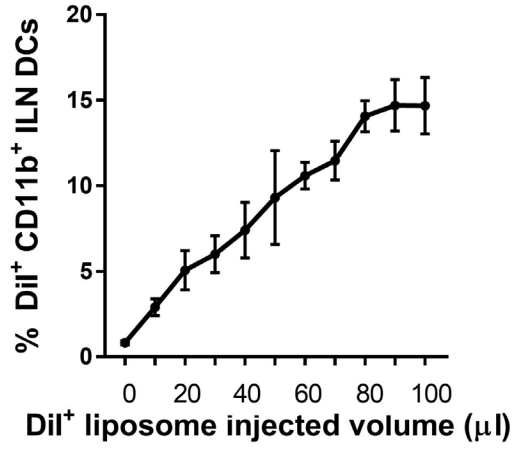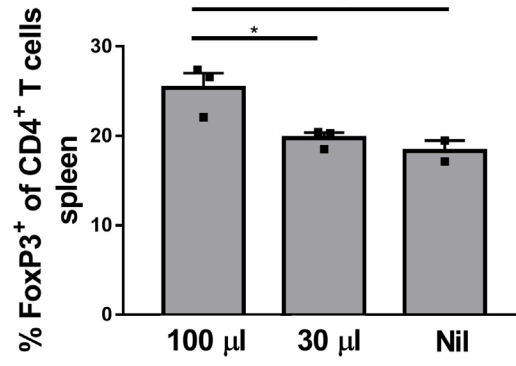

## Supplementary Figure 6. Phenotype of OVA-specific T cells responding to liposomes

5 x 10<sup>6</sup> DO11.10 T cells were adoptively transferred to BALB/c hosts. Mice were treated with liposomes twice as shown, on days 0 and 6. A: Example of flow cytometric staining. Foxp3<sup>+</sup> T cells (pink) increase with OVA-calcitriol-liposomes. Of the Foxp3<sup>+</sup> T cells, CD73 (red) proportion and intensity increase with OVA-calcitriol liposomes. After OVA-calcitriol liposomes, these CD73<sup>+</sup> (red) cells co-express PD1, and some co-express CD39. Foxp3<sup>+</sup>PD1<sup>+</sup> T cells (green) increase after OVA-calcitriol liposomes and all are CXCR5<sup>-</sup>. B: PD1 expression (MFI) by Foxp3<sup>+</sup> T cells after treatment with blank, OVA or OVA-calcitriol liposomes.

A

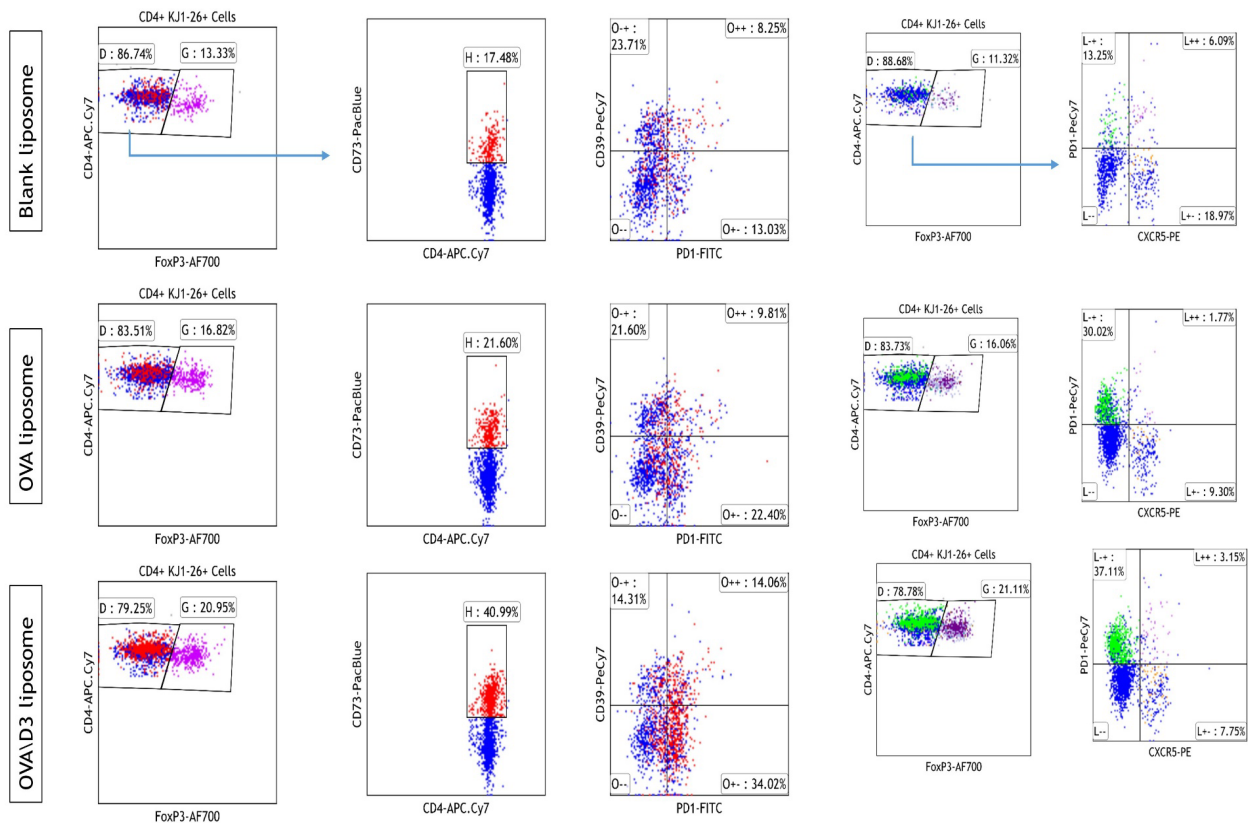

B

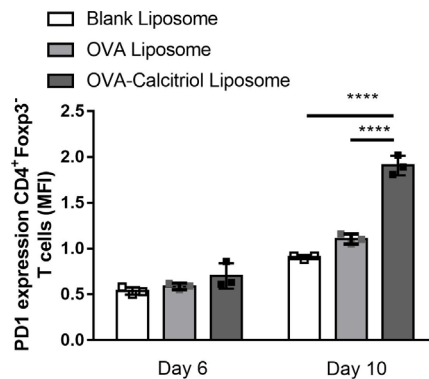



### Supplementary Figure 7. Phenotype of *ex vivo*-generated OVA-specific T<sub>EM</sub> cells

Splenocytes and pooled LN cells isolated from DO11.10 mice were cultured for *ex vivo* memory T cell generation as described in Material and Methods. Representative phenotyping of cells at time of transfer is shown. CM= central memory T cells. EM= effector memory T cells.

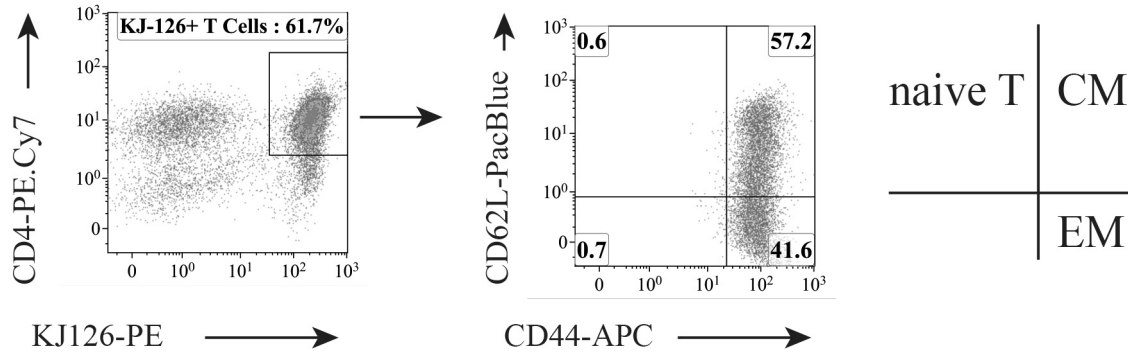

Supplement: jciinsight-4-126025-s135.pdf [file jciinsight-4-126025-s135.pdf]
